# Supplementary material for: Effects of xylem embolism on the winter survival of Abies veitchii shoots in an upper subalpine region of central Japan
Source: PubMed Central journal article supplement (PMC7171099; doi:10.1038/s41598-020-62651-2), 2020-04-20
Supplement: 41598_2020_62651_MOESM1_ESM.pdf [file 41598_2020_62651_MOESM1_ESM.pdf]

1 Effects of xylem embolism on the winter survival of *Abies veitchii*  
2 shoots in an upper subalpine region of central Japan

3 Authors

4 Emiko Maruta, Mitsumasa Kubota, Takefumi Ikeda

5

6 Supplementary figures:

7

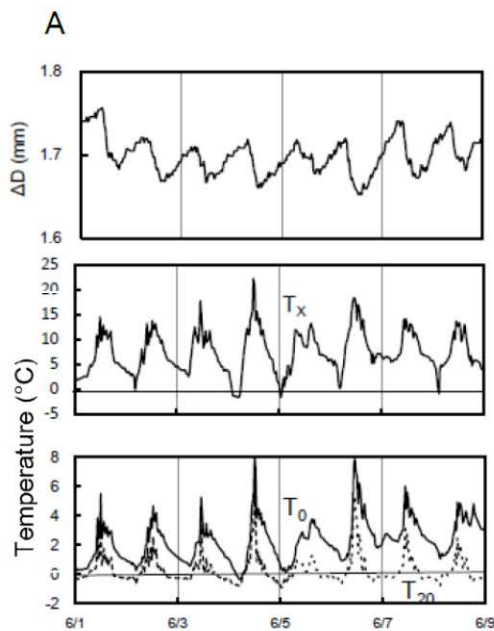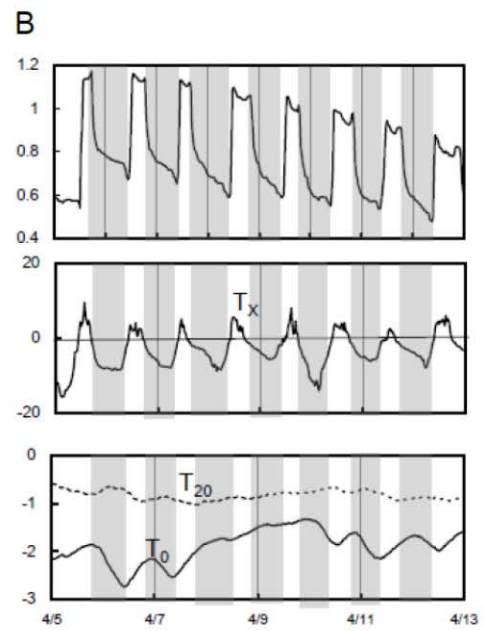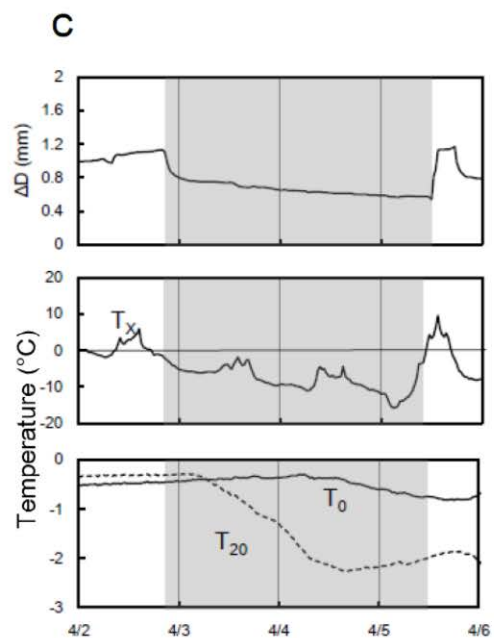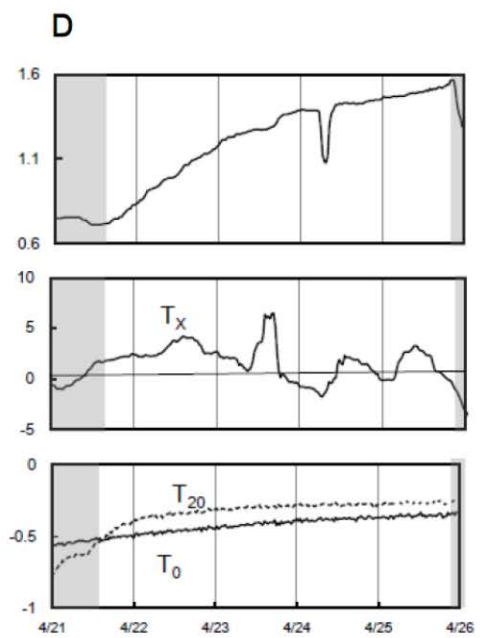

19 Fig. S1 Typical patterns of the variation in branch diameter ( $\Delta D$ ) during (A) transpiration cycle,  
20 (B) freeze-thaw cycle, (C) freezing period, and (D) rehydration period for a tree at the W+ site.  
21 The corresponding soil ( $T_0$  and  $T_{20}$ ) and branch ( $T_x$ ) temperatures are shown. Grey shading  
22 delineates a phase of decrease in diameter due to freezing. (A) Transpiration cycle: Diurnal  
23 changes in diameter, shrinkage in daytime and swelling in nighttime reflect changes in the  
24 amount of reservoir water as induced by transpiration<sup>36</sup>; (B) Freeze-thaw cycle: Diurnal changes  
25 in diameter, swelling in daytime and shrinkage in nighttime opposing to those of transpiration  
26 cycle reflect changes in the amount of reservoir water in accordance with freezing and thawing  
27 in the apoplast. The diurnal amplitude of the change in freeze-thaw cycles (B) is 5–10 times  
28 larger than that in the transpiration cycle (A); (C) Freezing period: Ice nucleation in the apoplast  
29 creates a high water driving force from living tissues to the apoplast because water potential of  
30 ice depends on temperature; water potential of ice by decreases 1.22 MPa per 1°C in  
31 temperature<sup>40</sup>. The diameter continues to shrink in accordance with the declining level of water  
32 stored in reservoirs depending on ice temperature. (D) Rehydration period: When soil water is  
33 occasionally available after rainfall, the diameter swells due to the rehydration of reservoirs (see  
34 Figs S3 and S4 for details).

36 **Fig. S2**

37

A

38

39

40

41

42

43

44

45

46

47

48

49

50

51

52

53

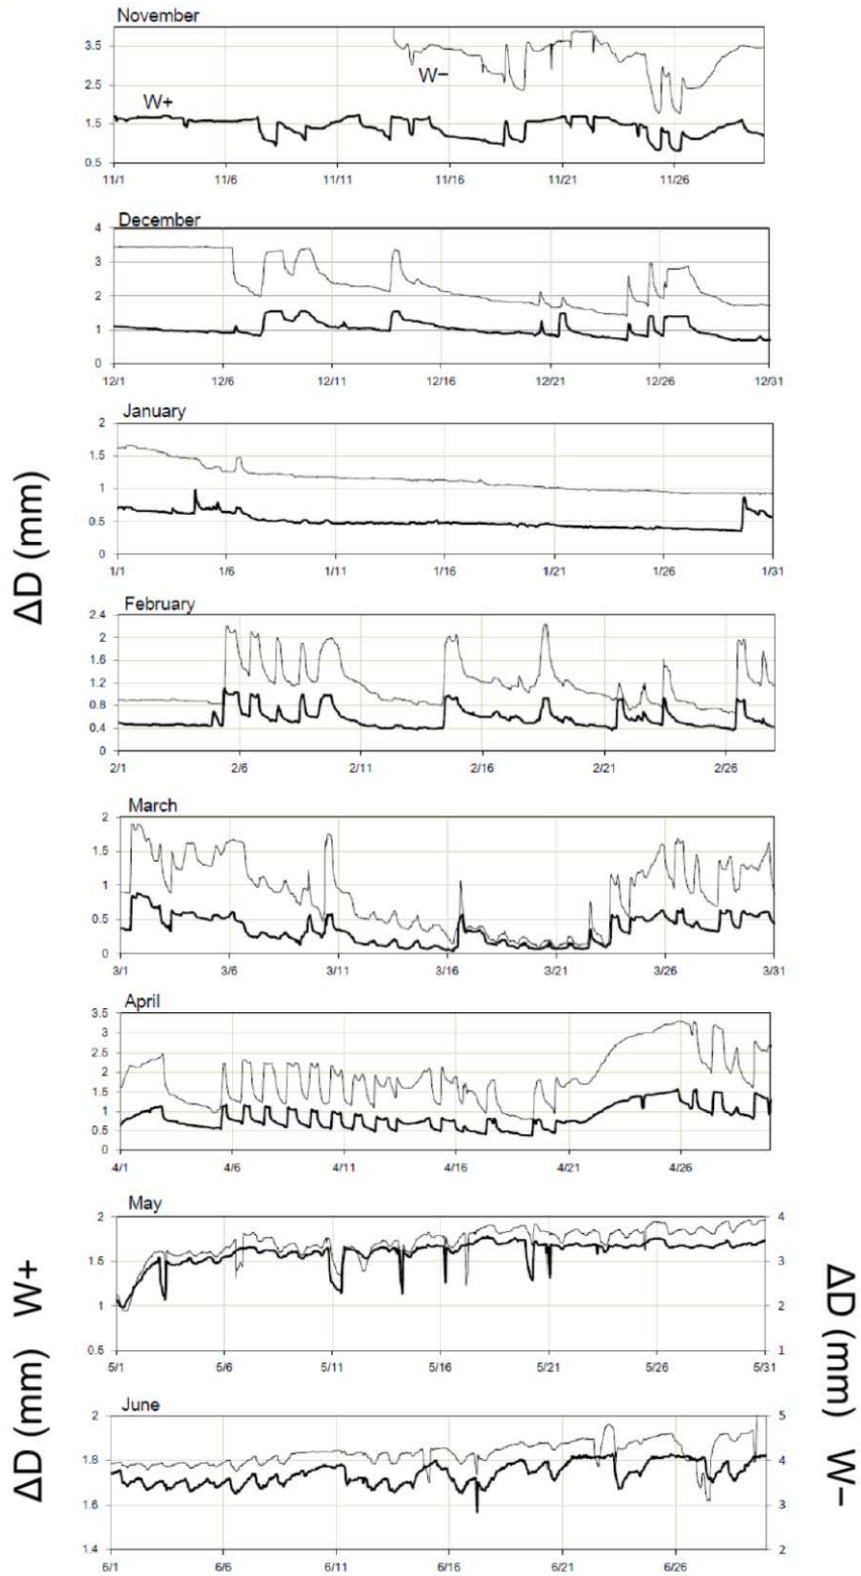

54 **Fig.S2 (Continued)**

55

**B**

56

57

58

59

60

61

62

63

64

65

66

67

68

69

70

71

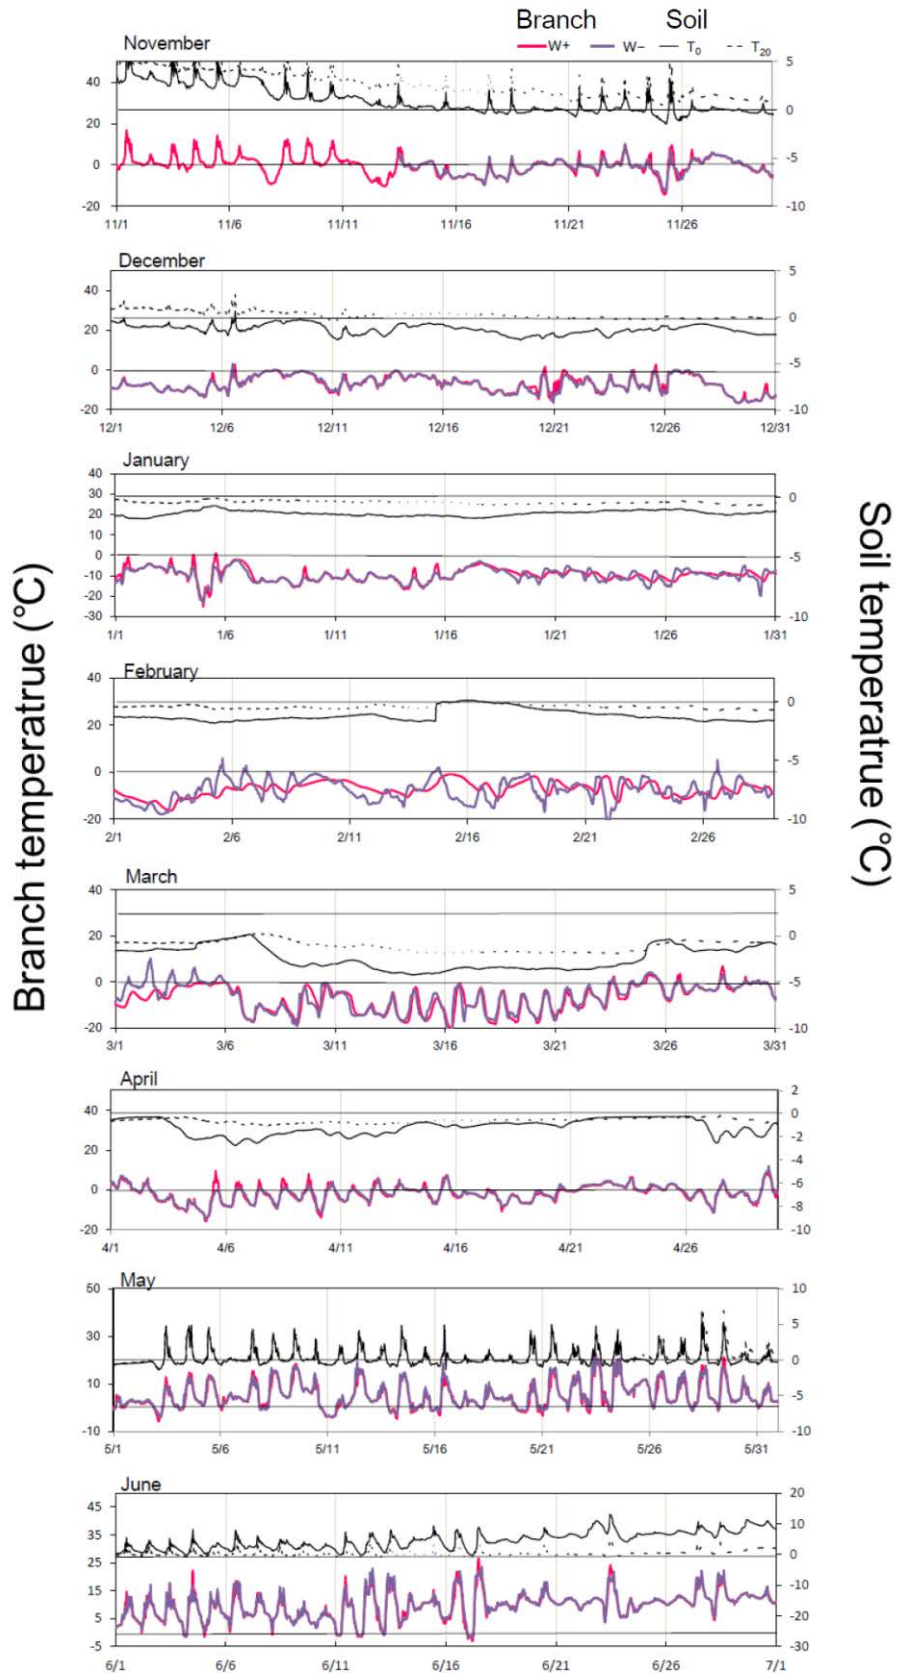

Soil temperature (°C)

72 Fig. S2 Detailed representations of data shown in Fig. 8. (A) Variations in branch diameter ( $\Delta D$ )  
73 from the W+ (bold line) and W- (fine line) sites. (B) Variation in branch ( $T_x$ ) and soil ( $T_0$  and  
74  $T_{20}$ ) temperatures. In December and January, the major pattern of diameter is a simple  
75 shrinkage in consistence with the sub-zero temperatures of the branch. In the period from  
76 February to April, freeze-thaw-cycle of the diameter change appears occasionally in  
77 consistence with freeze-thaw cycle of the branch temperatures. In the period from late March  
78 to April, simple swelling often occurs and lasted for 1 to several days after rainfall, although  
79 soil freezing persists (see Figs S3 and S4 for details). In early May, stomatal transpiration  
80 started immediately after the snow melted.

81 **Fig. S3**

82

83

84

85

86

87

88

89

90

91

92

93

94

95

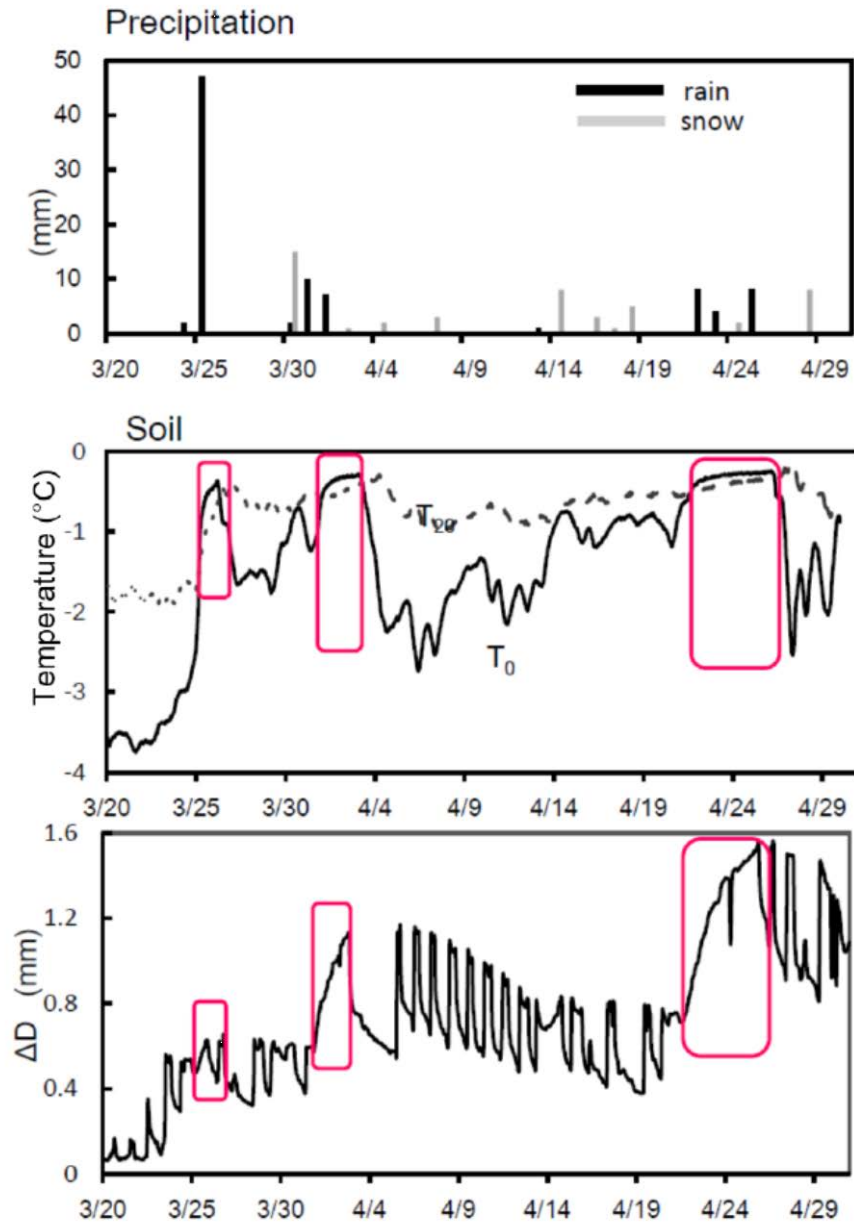

96 Fig. S3 Variation in precipitation, soil temperature ( $T_0$  and  $T_{20}$ ), and the variation in branch

97 diameter ( $\Delta D$ ) from March 20 to April 29 at the W+ site. Data from branch diameter are the

98 same as those shown in Fig.S2. Red rectangles delineate the rehydration period. Precipitation

99 data was obtained from the Japan Meteorological Agency; data were recorded at Shirakabako  
100 (1,440 m above sea level), which is 9 km north of the study site. In the precipitation graph,  
101 black bars indicate rain and grey bars indicate snow; the form of precipitation was determined  
102 based on whether the air temperature at the study site was above or below 0°C.

103

104 **Fig. S4**

105

106

107

108

109

110

111

112

113

114

115

116

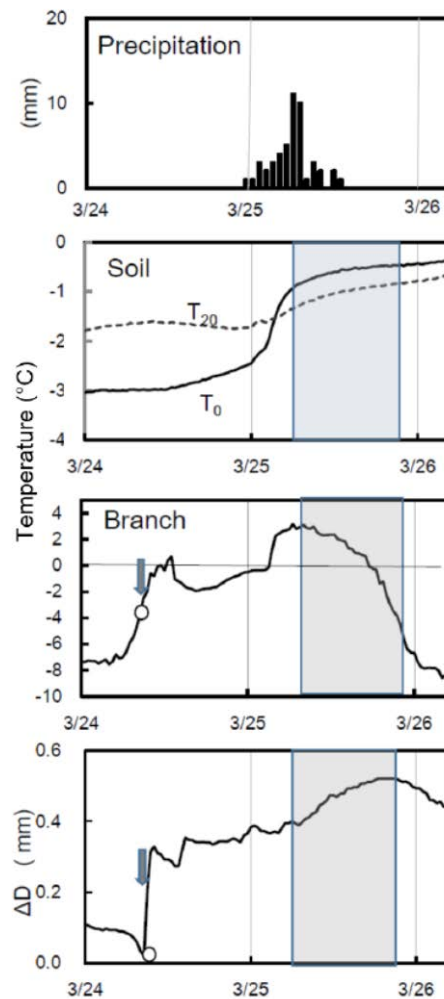

117 Fig. S4 The rehydration process of the bark reservoir at the first rain in early-spring (March

118 24–26, as shown in Fig.S2) showing precipitation, the corresponding soil temperature ( $T_0$  and

119  $T_{20}$ ), branch temperature ( $T_x$ ), and the variation in branch diameter ( $\Delta D$ ). Grey arrows indicate

120 thaw-induced expansion, which occurred when branch temperature increased above  $-4^\circ\text{C}$ , even

121 if soil was frozen. Grey shading delineates the rehydration phase and the subsequent diameter



122 expansion. Expansion of bark due to rehydration started when  $T_{20}$  increased above  $-1.2^{\circ}\text{C}$  and  
123 ceased when branch temperature decreased below  $-6^{\circ}\text{C}$ , even if the soil remained melted.
